# Supplementary material
Source: Elsevier journal article supplement (https://www.sciencedirect.com/science/article/pii/S2530064422000347)
Supplement: mmc1 [file S2530064422000347:mmc1.doc]

**Supplementary material**

**Figure S1.** Historical chart of the Abrolhos Bank developed by the cartographer Admiral Ernest Amédée Barthélemy Mouchez, in 1861.

**Figure S2. Timeline of naturalists’ reports on coral reefs of the Abrolhos Bank, Bahia, Brazil**. The numbers across the timeline correspond to the report number in Table 1.

**Table S1.** Characteristics of the five reefs, area, distance from the coast and geographic coordinates.

| **Reef** | **Area (km²)** | **Distance from the coast (km)** | **Lat** | **Long** |
| --- | --- | --- | --- | --- |
| Guaratibas | 0.77 | 6.65 | -17.4284 | -39.1373 |
| Timbebas | 10.09 | 15.18 | -17.4677 | -39.0134 |
| Recifes do canal | 8.27 | 13.9 | -17.6378 | -39.0226 |
| Coroa Vermelha | 7.83 | 10.57 | -17.9579 | -39.203 |
| Viçosa | 9.27 | 11 | -17.9925 | -39.2557 |

**Table S2. Cities and collections where historical information was compilated.**

| **State** | **City** | **Site** | **Website** |
| --- | --- | --- | --- |
| Rio de Janeiro | Rio de Janeiro | Biblioteca Nacional do Rio de Janeiro | http://bndigital.bn.gov.br |
| Rio de Janeiro | Rio de Janeiro | Museu Nacional | https://museunacional.ufrj.br |
| Rio de Janeiro | Rio de Janeiro | Museu Histórico Nacional | https://mhn.museus.gov.br |
| Pernambuco | Recife | Instituto Ricardo Brennand | https://institutoricardobrennand.org.br |
| Pernambuco | Recife | Biblioteca Pública do Estado de Pernambuco | https://biblioteca.pe.gov.br |
| Pernambuco | Recife | Museu do Estado de Pernambuco | https://museudoestadope.com.br |
| Pernambuco | Recife | Museu da Cidade de Recife | https://museudacidadedorecife.org |
| Pernambuco | Recife | Fundação Joaquim Nabuco | [https://fundaj.gov.br](https://fundaj.gov.br/) |
